# Supplementary material for: The Dynamic Changes of Transcription Factors During the Development Processes of Human Biparental and Uniparental Embryos
Source: Front Cell Dev Biol. 2021 Sep 17;9:709498. doi: 10.3389/fcell.2021.709498 (PMC8484909; doi:10.3389/fcell.2021.709498)
Supplement: Supplementary file 2 [file Data_Sheet_2.xlsx]

## Sheet: Supplementary Table1
Table S1. Number of cells used for analysis at different developmental stages.
	Oocyte	1-Cell	2-Cell	4-Cell	8-Cell	Morula
AG	-	4	8	10	23	44
BI	9	7	10	16	34	47
PG	-	4	10	11	20	28

## Sheet: Supplementary Table2
Table S2. TF expression (median TPM for each stage).
Symbol	BI_Oocyte	BI_1C	BI_2C	BI_4C	BI_8C	BI_Morula	AG_1C	AG_2C	AG_4C	AG_8C	AG_Morula	PG_1C	PG_2C	PG_4C	PG_8C	PG_Morula
ZNF138	4.22275	4.42014	4.91758	3.77052	12.4777	20.624	4.25695	7.26712	1.99228	11.7917	18.4761	4.15238	5.31073	3.61788	8.97045	29.3116
ZNF654	44.5187	54.5499	45.8681	30.9807	17.5202	2.88629	75.2589	70.8348	35.6102	19.313	3.91463	48.4787	53.6608	43.1665	28.104	5.21475
ZNF226	0.783573	1.8674	3.4361	3.51418	7.01471	9.88676	1.52755	3.84928	2.20006	6.20505	12.3561	1.49662	3.235	2.54318	11.7073	8.37171
ZNF808	0.171172	1.32587	5.05267	8.11106	6.39411	2.76607	2.35387	6.25367	4.00374	9.57027	5.40997	1.56831	4.07644	4.0788	5.31811	5.54778
HIC2	5.61151	9.07626	68.2365	23.7591	7.36613	45.4163	19.4774	70.785	26.2195	7.26201	26.4123	17.6876	42.3958	36.5613	13.5954	40.3572
MTF1	9.42146	15.37	37.9522	27.0769	33.7125	17.1912	18.424	35.0719	22.5555	41.3821	25.5497	19.0826	35.0926	29.6652	34.7387	31.2134
SP1	4.77558	5.71604	24.1661	13.0387	41.6826	51.5469	13.321	16.2379	14.3573	47.9588	31.3302	6.9732	23.5891	12.6657	50.0223	54.9365
THAP4	7.68281	9.71814	19.0882	20.076	8.62359	43.4757	10.3286	11.995	18.0942	13.1112	33.6885	9.1416	17.4887	16.3695	13.3678	44.2759
ZNF689	33.083	38.174	113.844	92.9513	74.4328	28.115	87.3419	128.037	99.3116	79.118	46.9466	44.3229	96.501	130.596	44.1549	45.2591
ZNF2	6.78173	15.7721	19.7602	6.75138	4.42198	2.37089	9.66621	27.5001	16.6815	6.41019	1.46797	8.0397	24.471	7.01593	5.29654	5.55086
PIAS4	21.352	15.8531	60.128	61.202	41.3951	56.9786	6.84073	33.0251	56.9971	23.3443	51.7077	23.2965	38.7152	54.2195	29.3309	72.0438
ZNF195	7.4763	5.69708	5.19407	4.32839	7.12194	12.9475	9.29874	5.90406	4.66908	4.0225	9.15215	5.69265	3.94995	4.47234	10.3931	22.3031
PIAS2	29.4278	26.7169	18.5905	16.8268	13.4154	4.59157	32.2354	22.6888	18.8225	14.9128	6.1154	17.3328	22.0868	15.7195	13.7279	6.30466
KLF11	31.3317	44.6428	135.795	68.2205	46.6018	27.8616	88.8531	169.583	70.0712	56.6555	33.9692	70.1042	115.668	85.2989	48.686	14.8405
ATF2	24.5292	26.1607	33.6998	55.7101	21.127	2.11908	40.2496	57.1746	54.2733	20.7907	3.39959	25.6989	41.1321	39.3208	24.1778	1.16944
ZNF595	18.9033	37.9986	35.1382	19.0672	57.9163	41.2737	31.9986	75.8267	35.2432	49.1288	55.6038	36.0562	61.5588	10.6978	60.0665	55.5693
ZNF304	6.39048	29.4059	50.4346	29.6822	24.1525	12.1975	33.5323	71.1179	47.0544	46.9541	13.5156	18.1256	47.3193	31.6135	34.2343	32.5077
TERF2	2.69988	7.74086	7.52147	4.19146	4.42733	6.09383	4.18535	4.64418	3.93754	5.1133	6.01298	8.91807	6.5771	2.41442	5.76378	6.42935
TFAM	42.824	34.8192	9.83256	8.74185	107.25	78.1919	29.9149	13.8787	4.92354	104.664	66.6542	21.9013	16.7097	4.6931	114.845	119.373
LCORL	13.4227	11.2444	5.10185	6.06631	3.3381	1.09008	13.1839	9.48085	5.3228	3.03699	1.07589	12.624	7.81686	3.99134	6.2201	2.13766
HMGB2	426.668	158.903	191.223	107.507	170.131	193.671	131.14	146.57	105.276	261.77	185.778	158.883	163.157	122.553	146.231	253.654
SMAD2	10.1498	11.4566	15.2327	10.9157	2.72105	3.64131	14.2086	15.2486	12.6421	2.94149	2.77013	7.88669	18.5242	9.09071	3.46233	4.7918
ZNF16	0.702689	4.86819	15.5908	13.0821	2.15721	5.57272	4.07697	13.6454	16.7949	5.05532	8.30806	2.52722	9.70412	13.3131	9.59091	13.2374
ZNF225	0.0288682	6.74496	5.57464	1.05392	1.67385	3.05412	3.8132	7.51022	1.15756	1.52731	3.30183	1.81211	4.3104	2.29959	1.49518	6.67134
ZNF547	0.0232184	40.0138	12.9201	3.2266	4.63727	3.91333	18.6285	17.6912	7.26206	7.46434	2.97042	13.4632	12.8981	5.32039	13.194	10.8646
ZNF260	3.51124	1.90772	5.01	2.27976	9.97359	21.1028	3.28565	10.1535	3.38696	9.5012	24.9346	1.79394	4.45346	4.77105	16.796	30.3341
DMRTB1	48.7473	38.3764	72.3358	42.2021	16.2662	25.9575	32.5189	59.3751	41.562	11.1911	31.1749	90.9411	54.6857	46.7164	13.5503	5.49818
ZNF143	63.1294	78.5405	133.922	98.3856	29.0553	20.9087	69.6276	174.358	92.5988	39.8783	44.3115	66.2374	121.558	80.0969	24.3624	44.1371
PBRM1	21.2888	16.4456	19.4912	10.7317	5.07701	7.55136	22.8266	20.1475	13.7736	3.62207	5.35082	14.3135	19.6094	13.9934	3.87306	5.45773
ADNP	1.64749	4.90383	3.07736	1.74328	6.88981	21.9796	4.41288	4.48204	3.03167	9.50416	18.6627	4.35419	5.23652	1.47448	16.0554	32.8787
ZNF22	30.6755	61.2564	32.9874	22.1322	18.5255	33.9431	37.163	64.9215	34.1505	11.9999	49.3112	67.4893	72.1904	24.1873	21.4224	79.4258
ZNF543	3.95218	5.04093	13.341	5.3314	6.57542	7.50937	1.27976	20.001	8.63114	8.20969	6.28716	4.14349	14.162	3.13081	6.53931	31.3996
ZNF562	10.931	25.5489	14.9159	12.1038	2.8023	7.39857	24.2684	27.0261	12.7492	1.55205	3.41451	11.1368	17.4666	7.01055	1.82898	15.4172
ZNF211	9.34681	13.111	8.20152	11.1006	13.0338	4.18153	11.3075	16.1202	6.5247	15.7251	8.03336	11.4032	8.31112	10.785	13.2093	7.98906
ZNF266	0.381022	5.52388	4.51672	1.04795	19.2136	8.57536	4.31728	3.40145	3.43217	21.7029	9.74972	1.57878	5.50989	2.93226	18.2103	19.0572
SP2	8.15953	17.2156	73.882	54.4143	12.5701	22.0945	27.4812	66.0387	42.4877	12.9821	26.6457	19.9431	62.2059	70.336	21.9851	19.4525
ZBTB10	4.59978	11.1008	11.8901	3.10289	13.9941	7.28075	24.6082	15.2084	4.03424	8.26883	9.08703	21.3151	27.9017	5.04055	13.9206	8.11619
ZIK1	14.4576	7.51	11.7398	4.77601	52.8616	12.1643	9.48346	12.0065	6.28644	54.8509	35.6175	18.3996	13.2601	6.35124	54.0099	36.1886
RREB1	2.8873	2.44668	3.22066	2.25626	13.4616	19.1609	2.09667	4.04301	1.53974	13.3056	16.8012	2.49453	2.8445	1.62406	8.28693	18.0491
ZNF845	8.82659	16.3428	14.335	22.7391	28.8365	28.203	16.5183	23.3095	23.1846	35.553	37.3284	10.0529	15.6767	21.423	22.1075	39.7164
MAX	4.24196	4.92056	11.7834	16.4121	14.3763	20.2053	8.51744	21.2215	12.5526	10.702	19.5149	4.67059	8.37214	13.4001	13.5535	27.6238
ZFP62	0.548695	11.14	11.9279	18.6204	10.3026	6.26191	6.93763	9.22674	23.4217	13.739	6.48814	7.98611	23.4015	14.9798	13.7269	11.9545
ZNF557	6.88228	28.918	13.7383	8.14658	32.5699	24.2195	9.91586	13.1375	8.67558	21.2258	35.893	6.8368	12.2022	11.5667	14.8088	32.5336
ZBTB5	4.46349	16.4578	39.8413	36.8748	5.10769	3.43062	50.9432	50.9872	34.6343	3.46231	10.6309	27.6367	50.5751	18.1395	11.1284	9.5798
ZNF600	14.8224	29.8096	25.2962	26.3273	15.4207	54.4681	24.1957	27.9909	14.0277	16.3917	57.7246	12.9143	17.7014	18.0647	8.01235	87.9021
MLX	26.2882	14.0524	26.7832	36.3565	18.8069	36.4946	6.15877	44.3053	35.2591	17.8832	38.5373	23.5917	25.6249	27.5961	22.7537	29.7261
TSC22D1	9.1226	17.5834	15.6422	19.5823	8.74584	4.277	16.1046	17.2336	13.9694	12.0588	7.9536	13.1599	19.8344	12.8209	6.05567	5.63499
ARID4A	80.4776	67.1676	52.8741	46.0572	31.5284	8.76018	93.9473	53.0378	44.4999	35.5218	8.6389	69.2671	65.749	39.0771	39.5661	7.95006
ZSCAN22	0	4.2669	14.1681	5.77924	3.84918	6.24568	2.97261	19.254	3.92135	3.14429	2.44036	1.79343	10.6815	3.91402	2.76811	4.01048
OTX2	1680.51	3742.59	2661.54	3307.11	493.566	7.93655	3312.26	2391.2	3112.77	703.052	8.88897	2221.68	2702.28	2950.89	707.583	3.78787
THAP6	11.8957	7.1246	3.86728	2.57351	11.6809	7.71226	8.77434	7.30358	3.74888	9.75792	9.83955	5.34807	8.61244	2.51068	19.1431	10.9057
REST	20.0728	10.0339	3.50497	5.52166	44.4787	72.3656	21.2216	4.91214	4.52362	58.1821	83.4241	13.0218	6.019	5.05668	17.1197	73.9419
CSDE1	142.652	205.485	254.455	333.661	122.278	123.316	249.853	302.204	336.858	100.793	88.3109	155.554	230.988	273.431	152.022	172.471
ZNF641	0.869217	7.29084	9.97914	3.9041	1.13538	2.70211	7.37249	11.8911	8.25419	1.99654	2.68851	5.92934	11.8871	8.54924	1.95476	4.05907
ZNF90	15.5674	10.4453	15.3391	7.40281	36.4758	78.2626	20.0251	20.644	8.07248	27.0351	64.4999	21.5945	21.7436	7.88635	16.6024	101.043
ZNF257	6.61837	1.40138	8.19979	3.15866	3.6121	12.0835	2.43697	9.0191	4.36613	6.57742	12.9015	1.46975	9.91037	2.96181	9.27328	19.4016
PPARD	0.644828	2.6823	20.1742	16.578	14.1138	8.59058	6.59947	27.565	11.8044	20.2483	9.40036	10.0709	12.5136	12.584	23.3433	8.76214
ZNF561	2.66313	5.98827	9.8507	5.7461	11.5387	11.5008	8.44258	18.3349	7.47712	8.629	11.0855	6.22277	14.4124	2.89763	15.8303	15.6439
LHX2	2.36997	2.05601	9.94607	3.27594	8.46606	9.26599	4.92283	5.11886	3.02617	7.69834	5.02761	2.57534	7.01639	7.16326	7.38294	3.38208
ZNF816	0.0443338	6.00369	6.88438	10.669	30.0634	18.2861	11.2495	12.1481	12.0743	13.7424	41.8535	11.0611	11.8275	10.5285	29.0493	42.6413
GTF3A	9.8676	5.11557	7.2023	6.52696	8.36943	82.9065	3.53151	6.90189	7.28583	12.8234	103.859	9.28906	6.30455	7.60346	5.06215	44.8854
ZNF134	30.677	80.2196	76.9152	53.4375	76.8785	70.6544	78.6623	124.994	82.0353	65.4863	85.2432	51.9063	86.1325	39.1498	83.5802	176.591
POU2F1	5.00774	4.01542	8.09246	8.16921	5.03524	3.86713	5.95382	6.98097	6.54136	5.55306	3.72309	4.43351	7.40218	10.5644	6.14705	4.42964
ZNF136	40.5952	27.8911	51.0089	21.8965	49.0981	9.00101	40.0372	56.6846	38.0548	45.6686	12.2988	39.4768	57.2651	28.9197	56.0858	12.0749
HMG20B	1.40218	2.96894	5.81888	8.44125	9.43537	9.10954	2.32589	3.2746	7.91394	8.09953	9.22632	2.23748	4.73705	6.40994	6.54425	11.3537
MYBL2	6.12959	28.3307	96.2886	54.0827	181.62	526.152	27.6303	46.135	35.1932	118.457	477.783	29.2419	60.5082	38.9729	87.3717	561.968
ZNF397	110.295	44.3911	38.8005	24.6569	12.6527	7.11083	42.8261	43.695	22.5744	16.799	8.34823	37.6614	34.7075	30.1775	23.8477	10.8225
FOXO3	11.7486	10.8119	37.0747	19.1563	4.56499	4.2408	32.7314	32.7545	24.3185	2.53064	5.67071	17.691	30.4765	28.1842	8.83552	5.01244
ZBTB6	1.02785	10.7177	9.96169	7.02431	7.77486	6.54935	9.6566	19.7603	9.27881	11.0472	10.0146	10.9572	10.7731	7.65908	19.7442	4.94481
CREB1	10.7788	11.4775	16.8138	19.2392	18.4286	6.61254	11.6427	19.9153	16.4295	14.2004	7.41246	10.9977	18.0751	12.6043	15.8799	13.8356
ZNF329	2.46548	2.48962	9.87012	10.2765	3.16434	1.45319	1.66597	10.4487	5.54149	2.75943	3.13645	1.76809	7.47777	4.67826	3.75563	2.70811
ZNF140	11.2703	5.1834	6.07895	5.46999	22.9513	3.885	4.86739	10.4246	7.27063	22.566	5.13994	4.0378	7.05945	5.65974	22.4822	4.75627
ZNF765	6.34858	11.348	15.2998	20.871	11.5425	7.12133	13.3387	21.3977	16.5597	6.57346	9.86247	6.85643	17.7868	12.5903	5.58369	22.4033
CCDC88A	14.2363	8.36695	9.36079	5.0975	4.83551	3.87885	18.6806	10.7125	5.89351	4.06515	3.66516	12.6314	13.8528	7.0823	5.14215	4.94182
ZNF829	9.84207	7.73225	9.80228	7.78356	18.3628	12.3359	16.2598	11.8803	2.04014	22.0538	13.8131	5.10325	7.26911	4.52484	20.2629	19.6093
TADA2A	25.9546	20.0037	52.0272	33.8543	7.26866	7.75698	21.6554	44.5135	26.7126	6.60844	7.74438	20.9754	47.9456	34.3124	15.3208	4.44966
SMAD5	21.6819	23.7499	12.3041	7.38979	13.2745	6.68778	20.5579	22.3584	8.44589	7.00235	6.91364	18.0753	18.4143	6.92131	11.2115	11.7081
ZNF419	3.39919	9.44842	14.5509	5.46997	3.68009	3.66363	14.8575	19.9825	6.99145	4.85821	4.23679	8.93982	17.1661	7.52694	5.05016	5.93344
SETDB1	1.18264	2.22643	12.6814	7.22121	1.60326	2.86019	1.46227	16.7968	5.36379	1.23791	3.20695	3.2005	6.023	4.5083	3.01764	2.41699
OSR2	49.6514	18.9551	32.421	67.921	13.3473	32.3382	13.7228	29.7832	52.95	11.9308	21.8776	24.6581	39.7365	41.6926	14.0023	25.6969
ZNF555	7.68534	34.8929	41.8748	25.0302	13.3944	2.17013	33.5178	63.458	28.0135	23.1193	5.99849	30.3062	45.2216	20.9664	16.5226	4.61985
RBPJ	23.5906	11.2786	9.60918	9.52308	27.8346	15.2418	18.6859	16.2847	15.614	22.6922	14.5015	13.561	15.4621	12.4074	22.18	17.2915
ZNF528	5.64757	2.60702	6.19493	4.21478	6.00563	12.3027	2.68195	4.31865	2.26223	5.49329	14.0172	2.94691	4.64081	2.98979	8.03988	17.7245
ZNF416	0.173612	45.3088	181.583	90.7003	159.541	134.439	83.6685	193.265	147.667	195.562	154.411	71.6678	126.446	74.0634	102.509	229.773
ZNF776	0.326381	2.94165	8.19737	6.01114	9.06358	3.34098	5.39332	13.8906	5.18911	19.1801	7.7915	1.70266	8.65847	2.94436	15.903	18.1224
FOXO1	8.3831	11.1642	38.1009	20.324	5.40858	16.5081	47.2162	32.3005	21.8322	3.60136	15.3672	31.4788	40.4066	27.219	10.533	41.565
ZNF296	0.106106	1.47626	5.71596	27.3956	451.089	504.264	2.26037	2.92768	12.866	651.563	786.337	4.29568	4.36148	60.7825	756.707	592.076
ELK4	38.241	52.3365	14.2834	8.21961	3.61349	1.28955	36.7121	18.8207	11.0823	2.14929	1.66641	34.0658	22.7687	5.038	2.27467	3.01446
TERF1	4.19911	1.6031	1.80211	2.53171	6.59314	7.16596	3.77823	2.20022	2.25992	6.6246	7.53564	3.2925	4.08514	5.24652	10.0095	8.12001
AFF1	34.1696	36.2226	68.0634	54.1587	25.5572	15.171	66.9898	74.3717	38.5039	27.9445	19.6028	42.2665	58.9824	41.7137	45.977	21.5279
ELF2	2.60339	1.6072	2.74346	3.00218	7.82675	7.7825	2.12869	3.02384	1.99166	7.21652	11.5879	2.75045	1.64667	2.45268	9.34752	6.03727
NSD2	9.18652	9.51714	40.511	19.6385	4.83091	2.95226	22.8015	31.3683	22.4211	4.66363	1.19222	18.0809	32.2709	19.6533	11.6772	3.2684
FOS	38.9953	15.7239	43.9839	37.3903	25.2003	15.0211	16.6664	43.6668	19.5967	24.0696	4.12048	12.6103	19.5927	42.0435	13.6466	1.35488
DMTF1	8.5697	4.28996	9.911	7.10408	6.55412	2.46575	8.18527	12.4303	6.49156	3.96932	5.16929	6.06202	7.95792	6.47681	2.67334	7.27159
STAT3	2.5689	2.20433	5.72486	13.3014	6.47181	75.4153	2.86446	13.2483	9.46925	8.68669	42.4588	2.88283	3.1403	13.3437	5.71808	42.406
ZKSCAN5	3.15926	6.56618	10.3416	5.82693	15.1863	7.23703	8.61795	8.31317	4.95082	12.8365	8.7117	3.39819	8.9512	6.31266	17.4976	11.5833
KLF5	43.0239	28.0115	22.9313	23.7165	111.304	85.4113	25.0836	19.9242	25.5834	26.788	70.7872	43.2756	20.1827	18.0727	40.5775	55.8235
ZNF343	0.0629143	5.91614	11.1245	7.87725	10.1912	10.1131	5.2515	8.62407	7.70327	19.4862	8.96986	1.77861	7.1688	6.04557	13.6997	15.9384
THAP7	0.479086	4.14994	11.6317	11.4431	9.9881	16.9001	1.64766	3.27596	5.36506	6.85325	25.129	2.66776	7.18243	7.32334	13.6654	19.3667
TOX4	24.9153	27.4303	53.7259	62.1152	165.145	39.5454	30.3004	42.519	38.9414	115.839	59.4695	17.9115	43.7364	47.3392	157.487	43.6477
ELK3	17.4422	14.2186	35.5508	18.6445	5.71312	9.04981	32.4889	32.1309	22.0973	3.38329	3.36163	38.9586	37.6999	20.4193	5.47111	4.66622
ZNF559	9.67916	10.3981	6.11461	1.866	2.19327	5.40261	11.6831	9.66305	5.26949	4.91769	6.49992	10.7828	7.20654	1.2219	2.28785	7.45877
ARNT	0.598245	6.26534	7.83507	4.1999	2.22445	10.0527	3.76319	14.5515	4.61893	2.01565	6.04581	2.26458	7.25523	4.77699	2.52178	12.3632
IRF1	1.2779	2.74231	16.3769	9.00366	5.28918	2.30939	2.0301	8.89055	6.95987	3.70329	2.83576	2.69364	12.6119	11.7297	7.26507	3.0742
ZNF229	0.650988	10.6964	16.3387	7.17098	4.49294	4.19892	24.1975	35.2642	13.4926	5.96241	7.13517	8.40848	16.1027	23.0795	8.82503	9.97985
RCOR3	2.62054	5.99968	14.6423	6.58081	4.27326	8.32104	8.45909	15.0394	6.68707	5.36167	5.75748	4.04511	14.8309	7.3424	3.34344	8.33108
ZNF354A	152.071	72.4327	63.9094	25.2915	18.0722	30.5811	102.036	74.1396	49.8712	10.0454	31.8643	78.0855	90.9509	24.164	13.0242	20.9064
ZKSCAN4	2.31659	13.5919	40.1006	32.7327	19.9717	31.8681	27.1625	79.4446	21.8768	32.8313	61.6341	15.5209	41.0927	27.3557	40.7782	43.7201
ZNF875	0.975635	6.58801	9.57232	6.78936	10.3444	13.3599	14.0978	13.9466	11.1941	7.14617	16.8876	6.04602	9.60983	6.54633	13.5315	23.7704
MAEL	144.474	145.56	124.794	95.4236	32.948	46.0884	131.08	192.559	140.488	27.5602	89.5682	163.245	146.274	71.2197	23.0349	91.8564
ZNF507	2.8887	2.79818	6.18238	5.64017	3.17671	4.24963	4.67499	9.97561	5.23856	3.15641	4.01086	2.24361	4.93191	3.46391	2.60814	10.06
ZNF281	67.8305	52.2598	79.3871	64.9715	70.606	36.0502	140.493	117.942	90.6004	70.962	54.6159	78.6232	102.19	77.9492	87.4198	66.1777
MIS18BP1	25.5655	30.1456	25.0789	20.3319	23.4668	15.8636	46.3185	28.7312	21.5591	19.9341	13.4894	18.9424	28.0499	19.9875	25.0586	24.6478
ZNF85	5.19044	2.49707	3.36866	2.31584	2.87045	2.84485	3.89765	4.24417	1.58793	1.61057	4.21649	3.07211	4.647	1.45847	4.38109	3.08422
ZNF200	6.01702	22.2242	32.6641	20.781	9.84675	18.7177	23.9658	43.5476	26.4476	8.53404	32.9561	12.757	31.3596	20.3506	12.9438	29.7013
ZNF526	0.338563	3.75884	27.4685	27.9149	16.9193	56.6559	4.67657	28.0744	20.0697	9.73129	64.1528	4.98831	17.7283	20.7668	34.9829	81.4455
ZNF473	0.0298463	3.19591	4.95384	2.59822	54.1595	10.1804	4.40753	6.31868	5.87017	54.4422	19.6436	2.15154	3.53941	4.65665	49.5979	19.5072
ZNF606	3.75861	6.73075	9.41032	2.03389	6.95697	3.31416	12.478	14.4539	4.17352	2.87509	3.25405	6.69887	10.9947	3.4472	3.14865	8.55565
SALL4	20.3139	37.2798	29.8567	19.2307	47.4772	143.715	32.5084	31.9417	26.1091	50.9929	132.986	19.9345	24.8747	28.4197	19.8706	176.769
ZNF18	0	5.79459	14.6759	5.40392	12.173	5.65846	6.52556	19.2811	9.86728	6.73756	9.97431	2.59005	9.32206	7.50761	9.00518	12.9128
NR6A1	444.808	284.842	63.0492	77.7405	19.031	23.8454	225.668	90.367	73.9548	12.2718	23.0213	195.388	66.0798	49.5202	23.3295	22.8917
ZNF141	1.99656	2.46209	3.07312	2.00793	8.79635	9.35684	2.8641	5.62297	2.74269	10.7537	12.1992	2.1803	4.34301	1.6396	9.66407	12.1123
NFX1	6.01561	5.93209	18.909	12.3926	37.642	45.244	6.23169	28.6246	16.078	35.9971	42.679	6.19002	15.052	11.2602	15.7881	53.1748
ZNF778	0.00755788	3.5932	8.2672	4.63407	8.52625	5.44481	2.37667	9.71744	3.48199	10.3822	6.92315	2.54049	9.61969	4.11062	10.1612	6.98306
ZNF529	6.57381	8.18096	5.79353	4.24537	2.70296	4.30956	12.2017	11.9931	5.0779	2.93782	3.30549	1.62529	8.54375	3.44449	2.69651	4.02388
ZNF148	31.8481	21.4618	19.7066	14.6991	15.4737	7.20038	32.6967	32.411	21.8656	16.1825	9.6775	22.591	25.5093	13.7813	15.7979	7.28104
SMARCC1	7.20102	7.8388	18.9724	8.93278	5.72913	28.6292	16.9524	13.8672	12.1075	6.27376	18.7691	9.63084	14.6752	9.51848	13.0353	23.6529
ZNF550	0.466437	5.45257	4.96117	4.8544	1.87325	3.60414	5.43892	11.0522	5.75453	3.81481	3.57399	3.48689	4.3175	4.45586	2.6815	6.38663
ZFP3	0.737052	13.1122	13.5082	4.75117	5.51128	3.48697	6.86507	18.3822	3.72006	5.14905	6.33375	6.56502	12.2689	8.01153	4.14903	14.0996
ZNF597	22.0456	74.6654	99.2142	39.2118	120.643	21.4858	117.338	170.087	37.0493	150.996	35.7599	67.6916	124.488	58.3183	118.149	15.7133
ZNF652	45.3314	50.5529	74.005	60.0144	13.0247	4.20384	64.3963	88.1262	57.9666	10.4968	5.17013	38.6647	64.855	55.0745	19.2559	12.7449
ZNF431	0.225111	2.75695	3.06964	1.60765	4.09681	4.23964	1.31031	4.87314	2.04192	2.6326	4.89183	1.28439	3.3884	3.05762	3.81832	6.52
MIER1	18.915	25.1142	10.5542	9.70081	11.995	5.4453	13.1669	10.4358	9.20383	9.65929	6.18083	14.2883	14.368	10.2581	8.04891	9.50087
LRRFIP2	2.92108	8.53271	16.7825	17.3886	14.8444	12.7795	7.43321	17.0206	14.838	10.2031	11.9657	7.8957	14.9197	16.9812	14.3646	7.93871
ZNF684	9.7301	4.6246	8.24112	1.44717	17.279	20.0086	4.80985	6.68231	1.11556	19.1554	20.1071	4.95022	4.77924	1.57919	26.9601	38.0031
ZNF251	18.6386	29.7429	25.1683	15.825	10.8125	4.02636	14.92	31.8409	16.8577	2.49429	4.95349	23.4519	25.1358	12.9024	4.12676	13.3008
NFYB	33.6971	20.2331	8.20955	9.88063	37.6216	16.5687	20.8103	19.3719	10.9839	53.7647	14.9948	21.1661	13.8566	8.70982	48.2074	27.1046
ZNF677	42.9671	46.013	59.3008	64.9393	17.6644	12.5305	43.376	49.2125	44.9037	16.4228	13.2752	45.9913	57.1242	48.7341	27.7882	19.075
ARID3B	2.20948	4.68783	36.0627	23.052	31.2535	20.6659	14.8235	41.8865	28.3888	31.7587	33.4328	9.61821	26.2652	23.5268	16.1689	19.2508
ZNF581	0.427004	5.65932	37.2334	31.622	47.7915	341.218	6.8551	12.0425	17.6625	81.5348	336.643	9.36731	17.8779	31.4361	83.6648	349.102
VEZF1	57.7018	26.1921	69.5627	56.7823	5.27254	12.6328	55.4825	70.3733	47.0016	6.87415	9.38757	36.2046	52.7129	58.6869	14.5393	11.5283
ZNF518A	5.50822	5.59615	8.57266	4.1623	12.8496	13.5983	10.4807	10.9866	4.46029	14.3714	13.8339	6.56125	7.63803	3.75924	10.5556	16.5464
TFDP1	24.9138	38.7345	33.4384	22.0319	7.35834	21.1096	40.8311	52.816	25.6626	6.63415	9.14745	37.4495	28.1325	21.071	7.85622	22.4045
RELA	2.34754	3.83041	18.2965	14.0712	4.06559	6.73027	3.54101	10.0312	9.23154	2.71392	6.98881	5.75477	14.4795	14.5828	3.79126	10.477
ZNF43	2.4652	1.89188	2.38713	2.7296	10.5335	12.707	2.79105	3.09775	1.19178	11.3106	14.0009	2.29745	4.06901	2.50481	5.76997	14.0439
ZNF93	59.698	65.0197	105.719	39.2342	77.3125	19.6612	59.8469	118.875	74.9172	99.7162	19.8168	69.9954	101.462	33.3267	109.21	24.722
ZNF267	72.264	31.434	24.568	9.47552	41.8445	20.2778	29.8258	48.8964	14.4031	31.8949	26.9796	38.5836	31.2159	11.5996	35.1044	32.594
ZNF512	0.0114134	2.95447	7.9165	5.29244	5.32046	1.26006	5.15542	7.55859	6.59598	2.77168	2.186	3.5827	7.5845	4.46252	1.93639	2.79713
GMEB1	0.653161	11.639	35.0962	40.1739	11.4781	12.3941	5.2814	36.1095	27.8949	9.68769	10.6237	9.91617	24.3368	30.3723	13.0124	15.8506
ZNF680	10.2303	7.55739	4.72624	1.57598	25.612	27.9261	2.3325	11.6834	3.02642	21.0799	22.5195	10.6947	9.49068	1.8153	27.1489	38.0125
NFYC	5.0996	9.1288	21.5854	25.2472	20.4544	28.9385	6.79584	20.246	23.1629	17.3265	27.6319	6.45127	14.8463	20.2493	16.6237	35.6742
ZNF468	19.4106	28.1944	8.18465	18.8671	38.2454	30.852	30.2314	22.4535	9.67555	11.0596	26.8325	13.9607	8.64035	6.60901	6.35549	56.2087
ZBED4	5.43167	13.004	14.5099	6.27639	1.87453	5.08132	12.5595	22.9735	4.76586	1.08569	2.17868	4.83709	18.7578	6.31164	2.72599	13.0663
HMBOX1	5.42703	4.38374	7.26401	9.61707	1.94386	4.94832	8.11592	8.90675	6.8786	3.08984	4.04676	7.172	9.03412	4.63705	5.1869	6.75285
ZNF773	8.74526	6.87235	7.78796	1.56013	9.45475	6.28581	6.3585	12.1883	6.25406	9.34684	5.91509	4.98182	8.6705	3.81128	10.6926	11.6836
ZNF732	67.8939	31.6787	70.6189	60.6304	12.7819	20.4375	24.8067	94.219	36.6929	27.5212	35.3307	64.2975	72.4481	36.5593	30.9502	34.2324
ELK1	0.342654	1.09321	28.4392	28.4816	10.174	15.5973	3.64485	25.6761	9.5056	7.16523	24.1973	5.44342	13.803	19.8753	20.6697	43.1819
NR5A2	3.57703	6.23413	5.27429	3.93102	6.08707	9.25385	1.56056	6.70179	5.34914	5.31547	9.67129	7.88143	4.95678	2.52247	1.8861	8.59885
ZNF217	1.12556	2.6852	10.4382	9.10152	8.5895	18.0276	4.53642	12.1441	5.61334	11.9852	14.1297	3.43364	10.8192	5.94178	17.9711	15.5712
CDC5L	81.9984	96.674	135.94	110.398	74.2263	70.508	140.49	137.795	111.039	89.0919	39.0828	110.002	134.058	83.7666	116.826	76.3219
TSC22D2	23.3437	8.84138	26.6618	15.6143	6.2365	5.98293	17.1325	23.646	15.5155	8.81349	7.17778	11.9131	24.3987	14.9731	10.2379	6.12217
ETV3	18.0299	58.3488	20.5329	19.4048	31.247	11.9523	25.083	28.1513	14.7424	34.8492	9.68596	20.0079	26.8508	22.5058	23.7266	17.3729
CTCF	13.0157	8.55902	10.5643	5.77494	119.424	36.4199	21.9142	12.0285	14.8094	86.8433	39.234	8.0309	14.9313	3.71439	105.375	36.0623
EGR1	55.5423	26.1737	20.0223	12.5427	12.9092	7.54616	14.4208	12.1512	15.5381	10.4727	1.86629	19.2885	21.1723	20.1346	16.3996	4.05825
LCOR	17.0915	21.2827	19.4238	18.8374	13.7659	7.59909	28.305	22.3957	17.8716	10.3307	6.41509	21.2591	25.5199	15.51	9.78161	15.3871
RFX7	1.12253	1.147	5.0052	3.20422	3.91091	1.66889	2.89533	4.10707	1.55559	1.38011	1.52773	1.28619	4.70941	3.2981	2.0178	1.44285
MEF2A	3.84537	1.67291	1.65587	1.17341	2.30059	2.0413	2.51136	2.64744	1.32622	2.95041	1.47216	3.1332	1.90058	1.21237	3.43846	2.85537
RCOR1	28.5635	27.845	65.1394	14.3476	31.3803	26.5028	60.0901	72.7856	23.213	21.8611	26.3533	50.4175	63.9097	21.1754	26.9359	18.2832
AFF4	9.23697	38.5461	50.8902	26.497	8.27964	7.79505	48.7904	81.935	43.2069	7.62896	7.5071	26.2956	69.6744	28.8077	17.1075	10.7227
ZNF805	17.9726	29.7116	39.655	23.6308	8.42708	6.87252	15.2717	55.4311	24.7863	6.7134	6.32707	15.9375	34.358	32.2333	12.6711	18.9658
ZNF584	1.03947	3.90219	13.0247	10.1052	20.2225	20.8138	4.80109	21.3638	10.4566	27.2142	15.6654	2.67627	13.9317	7.60694	31.0471	24.7454
ZSCAN2	9.76221	14.5377	4.77795	3.85669	1.62534	1.23008	6.035	6.16312	3.30391	1.32907	1.14212	8.02579	3.10382	2.18322	1.96997	1.19743
DNAJC1	61.0443	33.2494	73.6729	45.9245	20.1877	8.33036	28.5837	60.6492	41.9636	26.5469	13.0561	51.8372	60.7356	51.4977	26.0034	13.2018
ZSCAN9	9.04423	9.26651	23.4469	11.2983	4.4309	15.2868	12.319	25.0057	24.4193	7.99834	9.28096	15.9598	14.6698	14.8688	13.6275	18.8097
ZNF814	10.5575	29.8976	18.9029	9.83894	7.26323	20.206	31.4658	22.0449	10.9835	4.63358	29.1133	16.0668	22.4974	9.58914	9.18367	28.3135
SMARCC2	11.821	9.72193	25.2909	21.2047	5.04586	6.55207	13.8932	14.8761	14.3961	6.38215	5.56053	10.5074	20.692	15.8263	8.35547	5.26842
ZBTB21	10.2586	11.774	14.8387	9.05963	10.9224	4.50185	14.4608	21.2563	7.55029	8.37959	5.1765	11.7129	16.7865	5.84879	5.66829	8.02809
ZSCAN21	13.437	6.18703	39.9772	29.8923	3.97791	16.6212	3.76313	34.1923	34.0513	3.51046	18.3048	19.8014	28.803	45.6613	3.25778	31.8085
TCF3	1.27609	1.76487	10.335	4.92274	1.29678	7.48353	4.79204	5.16686	4.77679	1.10914	3.71011	4.80382	8.2365	3.76932	3.57382	5.04085
DEAF1	21.8242	11.1397	48.8598	32.8106	5.83593	4.12058	21.9524	39.3454	24.3615	6.60911	9.02716	21.2243	35.967	39.0398	13.6402	3.04614
ZNF44	21.993	2.82499	8.95661	3.53281	2.76712	5.23225	26.4279	12.0582	10.1212	6.44373	2.31482	16.5698	19.0358	6.09747	4.94334	7.23358
GATAD2B	9.04084	30.2222	32.4718	20.0878	6.61206	3.85084	21.605	43.8671	19.3338	5.00018	6.02705	15.049	21.3309	16.6633	8.18548	3.67247
ATMIN	2.45851	7.61163	26.2579	11.9399	4.30149	16.4811	13.7568	21.0377	12.6038	7.8781	12.2477	7.89895	27.8232	9.23813	12.4236	11.544
MBD4	168.086	97.0182	73.8621	65.0848	34.9983	21.4889	99.7194	98.7972	74.7665	28.5305	24.2059	109.398	59.706	61.4334	23.0272	15.9581
ZNF17	2.73319	3.5498	4.78647	1.56937	4.32651	6.10641	1.63225	9.45337	3.86015	4.40084	4.65648	5.17979	6.0454	2.49979	9.01985	5.90475
ZNF28	6.81642	4.56176	3.95557	5.61115	27.5352	23.9274	4.88426	7.06069	5.17952	12.1701	32.0443	3.21679	5.20276	2.13801	6.21828	65.1181
TGIF2	2.9383	2.08541	8.58158	6.9595	9.95205	26.9022	2.72285	7.32618	2.96161	17.9958	29.5266	4.01826	7.15514	5.59041	9.65484	14.7986
MYSM1	4.19594	2.95406	4.73892	2.42519	2.00247	6.28821	9.11723	6.22595	2.90558	1.58261	3.02386	3.78224	5.9643	1.6799	1.7602	6.79782
HEY2	19.5201	13.05	26.1929	19.9496	7.35452	26.4921	7.55033	17.7318	16.6904	11.5789	12.9287	14.6807	20.1289	23.6431	1.80024	15.023
ZNF84	7.75533	6.67135	4.85207	5.49669	7.1937	2.27306	7.18918	7.2242	6.54987	5.20244	4.65032	3.37935	4.84232	3.27745	4.19672	4.9672
NCOA1	13.0979	13.678	20.7784	13.0941	8.02869	14.0239	23.847	21.4157	15.4559	9.01133	9.54791	17.3576	27.1953	13.1724	9.82026	13.4966
SUB1	100.782	40.0807	32.9302	14.8879	86.2883	74.0215	52.427	37.8123	17.8553	72.5732	88.8793	88.2315	56.765	23.3274	79.3975	102.377
ZNF723	29.2958	29.128	32.927	16.9015	273.446	93.879	39.0789	24.7786	7.25405	299.808	160.964	28.6977	32.3758	24.6573	306.06	119.298
SOX13	3.57351	6.43353	67.4114	44.0869	15.3352	9.79065	11.3434	62.4091	35.613	14.7906	14.544	17.5657	39.2705	39.986	20.203	9.04703
ZNF292	15.916	9.11081	7.92906	4.059	4.08214	3.35748	21.712	10.951	5.2147	5.15351	2.8895	9.84778	8.3683	2.75387	7.97245	4.58818
ZNF277	47.1725	26.7405	12.5124	13.4964	2.40792	4.02479	25.4594	19.7478	15.1585	2.67495	3.69329	15.1003	15.7284	9.9379	3.22482	7.29274
ZNF426	33.6578	15.6141	35.0033	34.5764	15.1626	15.7594	24.7989	40.7287	33.6094	14.9674	13.7511	21.1343	34.8357	37.0868	28.2198	45.5293
ZNF83	1.10555	5.61938	6.96009	10.524	3.83094	8.57835	2.54062	8.30717	8.45232	2.83567	11.4025	1.66722	3.69542	4.55231	5.31612	14.466
ZNF107	6.22304	6.74135	18.5172	16.8799	7.64148	3.66733	3.60528	11.0104	13.4404	7.5844	3.96769	8.47955	9.91999	17.8761	11.8962	5.08449
ARID2	30.4965	34.0353	25.6497	15.3787	5.66503	6.85842	41.3218	27.0963	12.8404	4.06409	3.09181	26.5433	36.077	16.1961	10.4466	8.17804
ATF4	3.75518	9.89141	73.2261	53.7661	311.272	540.677	26.0427	35.1991	29.4984	337.224	548.927	30.1958	44.9808	56.5686	287.678	1145.66
KMT2C	66.0002	52.3542	127.718	82.4294	36.4642	24.1911	88.4567	140.664	99.2557	38.5167	24.1446	73.8735	106.557	86.5094	52.9865	23.1443
HIVEP1	6.13547	7.38187	28.2943	13.2483	3.20578	2.07606	13.2088	32.0308	12.1734	3.61019	3.72276	10.1159	21.1318	12.3758	6.69079	3.93144
MGA	40.6903	32.3333	22.504	11.4278	12.0817	16.073	37.9617	47.4476	10.9609	10.1487	14.7644	23.2354	31.7296	11.1773	13.2534	10.8496
ZNF560	0.0356011	6.21608	26.7257	24.6932	30.9114	16.4129	20.4447	40.1794	24.2189	14.9303	11.7449	7.48179	34.8452	14.8566	16.8201	49.2533
MSX2	17.5226	11.3928	7.16019	5.56293	7.43795	23.4766	8.6711	7.56839	5.89039	8.65085	15.9471	7.6505	7.75013	11.1404	8.65436	2.41982
ZNF616	1.67317	11.8789	9.26362	7.62075	7.66244	5.70232	12.3472	9.41842	11.0182	21.6765	10.2587	3.77761	10.6285	10.5772	13.6577	6.90526
DNAJC2	42.2424	33.2663	31.4674	17.3858	7.49215	27.9572	40.8202	49.9564	22.1073	7.93869	25.7629	42.7721	34.2326	18.8786	12.6078	37.2246
ZNF101	2.22492	2.3654	4.06664	2.51058	10.6429	16.2708	2.81434	6.47191	2.25065	9.80705	28.0275	2.95361	5.16551	3.85411	10.3972	13.1132
ZNF880	20.9781	13.4664	10.6872	5.22757	25.7106	29.52	8.2457	9.89819	3.96279	22.0417	24.4902	4.62171	11.5627	2.75703	28.8102	38.4445
HBP1	35.1286	38.2097	41.6185	29.6949	36.1333	9.56441	40.1082	53.1196	26.5173	29.7211	15.4025	31.0662	38.548	29.6532	28.9378	20.372
ZNF302	3.97694	2.20346	2.34911	1.29465	2.08538	2.28041	3.37557	3.57334	2.28695	1.68137	2.14339	2.58821	2.00591	1.14155	3.57689	4.66811
ZNF530	0.13066	1.83458	13.3702	12.2667	31.9163	7.12921	3.59534	15.927	8.1873	48.3389	9.20738	1.96722	9.52438	12.5051	30.6357	18.9887
GMEB2	1.8504	1.02687	7.22744	2.84509	5.29751	22.6058	4.30384	7.79459	2.83927	4.00505	22.8421	2.41883	6.23178	4.77268	1.29054	22.4955
ZNF502	22.042	20.1547	39.5973	22.6339	24.2993	3.9798	35.1943	50.2483	40.0774	25.1089	10.2845	22.3232	37.4512	25.8564	38.4432	8.14603
SSRP1	2.30461	4.88523	18.7378	7.18712	9.50131	39.6015	4.39594	7.07845	7.85235	5.96147	31.4568	8.77733	9.44888	8.86022	10.1099	43.6756
CSRNP2	4.51289	20.1226	29.3261	10.7776	6.0021	7.37956	14.8815	28.3036	30.5776	12.8595	8.96218	13.9808	28.853	14.0784	12.9976	8.35954
FOXJ3	5.40545	25.2088	76.9888	58.6341	46.1834	16.5246	36.4087	92.8006	57.0927	49.3741	12.7336	22.2723	77.0821	45.0806	38.7451	18.4684
CEBPG	26.1614	66.9782	68.1841	54.6724	56.3934	75.2109	60.0108	93.8033	46.0131	43.3062	78.3661	36.6046	67.1719	53.7501	35.0998	146.366
BACH1	98.927	110.899	154.658	107.905	11.3182	3.4666	138.31	158.987	96.422	13.0033	2.83214	124.399	168.869	104.909	21.3069	8.68686
FOXR1	159.317	69.1854	161.937	147.064	1420.41	811.577	70.2236	201.703	174.101	1310.05	1016.43	141.605	186.531	99.6221	936.746	943.073
YBX1	54.8997	35.5839	57.6615	73.4984	242.571	440.568	58.6927	43.9485	74.2994	281.851	371.041	33.0706	81.7069	61.3707	214.283	507.587
SATB2	3.21379	3.27189	5.01917	4.12009	28.5166	6.60179	2.35093	4.7787	3.20133	25.5066	6.4506	3.00633	4.13579	4.19326	11.4931	6.02418
ZNF571	5.60038	45.663	24.3422	13.8438	1.86761	3.20132	42.4033	40.5068	31.3772	3.05623	3.45818	23.753	33.0591	9.1687	2.77311	5.52954
ZNF215	102.978	134.8	133.936	78.4328	9.5664	5.53509	166.457	173.639	103.22	14.1781	8.04503	94.962	133.427	75.4125	18.9608	8.79195
ZKSCAN2	2.29297	5.8901	23.2229	11.4322	3.88968	3.666	11.8525	16.4056	14.5978	2.96738	2.85689	7.57041	19.9131	11.0129	6.33596	1.54067
THAP9	7.68559	14.1939	8.47464	13.4503	4.06857	6.66126	15.4513	14.7895	14.2415	7.41294	10.2762	6.12629	15.3676	6.96333	7.94863	17.5394
ZNF549	22.3051	26.9823	49.6835	34.1516	10.3018	7.59523	28.5635	66.9682	33.9389	15.0654	10.5693	24.8693	38.2017	38.7823	13.8611	9.0856
BAZ2A	13.4498	14.1334	90.711	70.3307	23.6433	27.5497	16.6322	110.125	70.0883	26.4926	29.2592	31.4122	67.9814	83.2894	37.9145	14.973
HMGB3	441.332	425.46	340.266	348.974	532.297	184.301	500.017	560.192	243.44	184.248	197.141	318.57	443.879	273.381	593.07	324.392
ZNF232	0.0164108	2.77416	7.16026	9.58818	2.7987	26.7687	1.05109	9.70682	8.18929	2.99902	52.9544	1.958	7.61063	7.842	1.58619	29.1226
MIER3	0.487894	2.68978	5.05393	2.38906	3.40912	6.15721	5.2518	6.74745	4.07365	2.19102	3.82081	2.87388	6.64714	2.96908	2.74857	5.6173
ZBTB24	22.8206	23.032	32.3571	26.2114	23.5335	13.3079	21.3127	39.9017	30.1128	40.4634	18.6583	22.6917	34.7799	15.4118	36.103	15.5245
ZNF532	9.64451	10.0389	16.8629	11.9157	3.18309	4.4751	9.85369	16.2099	11.3484	5.04942	3.11883	14.0081	19.4287	9.00981	8.10094	1.47306
UBTF	1.01045	1.49256	10.414	6.52458	18.1442	29.4835	2.69484	7.62239	6.62419	12.4479	26.3892	4.60734	7.48864	6.58877	6.58219	20.6038
ZNF92	8.2459	4.95272	3.35529	3.50956	43.7311	28.1843	3.79996	6.42472	2.98301	54.8186	40.5288	7.12534	6.94582	6.29948	43.7972	35.9442
ZBTB14	1.66365	6.14717	5.77082	4.28485	6.52875	9.21937	4.78062	4.94916	4.72606	4.7788	12.6489	4.4488	5.35715	3.12492	3.82257	15.4793
ZNF548	5.1539	14.431	13.6961	10.2204	7.61976	3.50302	7.85786	24.7952	10.1002	13.7905	3.01932	9.22523	13.8837	10.2621	6.98364	5.8366
ZZZ3	4.26116	6.4675	5.63258	3.49622	39.6706	10.1625	7.46444	8.55768	4.37869	46.1256	12.719	7.8238	6.40385	2.94322	15.1553	15.7343
ELF1	14.2194	21.3178	47.184	23.5055	24.0751	10.837	49.0931	45.5492	29.7363	19.3321	7.2446	27.9408	43.2676	24.1149	21.0433	13.6541
LIN28A	4.48227	6.613	10.413	24.2826	99.4389	405.84	20.4299	30.9954	13.0996	46.8842	750.524	8.9825	20.2351	22.2083	14.4197	574.663
HMGXB4	35.9037	33.8975	53.3261	44.5114	8.51677	11.3022	44.9774	57.6585	45.6389	9.73004	8.33777	31.7213	55.0241	54.4915	11.143	15.6703
ZNF823	0.0443964	11.971	10.6385	4.52139	61.572	7.16898	3.62206	17.096	2.0824	46.7084	17.607	6.58209	10.4796	12.7287	61.93	17.4065
ZNF626	4.80405	5.72469	2.89037	1.3329	2.75203	7.66596	5.06516	5.42569	2.39858	3.83387	9.57837	4.21333	5.51128	1.77732	3.23922	3.95728
PRDM2	8.21375	11.2668	33.6948	17.5054	10.2788	4.89664	15.318	37.4046	18.0033	14.7389	5.63306	14.4891	22.2882	17.2441	8.72747	8.45593
TULP3	191.042	218.962	361.297	508.368	84.884	36.7937	220.407	386.026	460.953	77.0412	65.4265	200.301	294.969	462.363	114.385	52.3945
HMGXB3	0.944739	6.82491	14.5563	10.4376	24.2222	21.3745	6.98592	23.2492	11.8172	29.0565	25.8016	6.75214	9.86098	13.1124	23.5971	24.6839
ZNF227	10.7255	16.8539	43.068	22.0072	3.1012	7.70956	16.9058	51.3894	20.3634	2.94922	5.51514	16.3886	32.7705	15.989	3.24236	8.13348
PAXBP1	1.63336	1.74737	4.56527	1.41859	14.4365	4.39958	4.12747	3.75602	2.998	9.31044	5.63412	4.25509	6.38911	2.00991	16.1714	6.72172
ARID4B	15.4529	7.55689	6.35492	2.5152	11.289	5.21917	20.0597	6.49301	2.77823	10.384	3.95982	12.6278	7.18917	5.08671	30.7866	3.61608
LRRFIP1	19.2404	12.7903	15.3555	10.3804	3.45595	4.01138	22.1306	14.3258	10.4434	3.35423	2.25986	13.6923	15.8303	16.7906	2.91426	4.53833
HMGA1	11.7569	25.0998	149.593	270.117	187.997	858.726	24.8567	61.3057	140.659	202.301	933.651	26.2575	89.1591	178.932	320.749	1067.01
HMG20A	7.96403	8.65817	16.1638	29.9125	4.41597	4.27497	7.44747	29.2153	27.6095	3.29358	3.49551	3.63132	19.2648	17.31	6.50101	4.58125
ZNF770	110.298	94.1194	164.996	110.848	26.8881	45.1858	82.3122	114.441	88.652	29.4564	60.8831	144.433	152.746	123.001	55.9705	109.909
ZNF813	5.73998	11.2362	10.9139	11.1769	4.49297	9.14917	8.51919	20.0533	10.4321	6.79351	8.37494	4.69667	11.5282	3.19708	2.09034	13.0965
FOXK2	3.75195	6.04723	18.7238	8.72687	5.0342	11.184	13.8698	13.6529	11.966	3.92014	6.87932	10.6718	16.3819	10.2779	7.985	12.6911
ZNF623	0.734748	12.6515	37.4277	25.1242	4.99079	14.4761	19.7506	45.6318	25.4076	3.22449	6.05468	5.98109	18.9626	18.3599	11.6949	15.2318
ZNF518B	10.7222	15.4598	18.1498	17.0687	7.76103	10.5899	14.4245	26.6146	12.6812	7.60961	7.87412	12.7754	16.0131	9.03269	8.55159	30.9105
ZNF436	5.82818	14.4649	24.6805	12.2021	26.245	4.69976	11.21	40.9173	19.5537	21.9113	6.05201	15.0503	28.5154	17.8964	29.3619	6.10793
ZBTB33	21.1098	73.6516	62.057	57.4923	34.8646	6.99116	81.9595	107.65	39.8316	5.71262	5.8623	57.3462	84.5605	46.4011	26.1407	12.7049
NR2C1	22.4475	19.7916	20.6743	14.9388	31.2394	39.776	21.3553	31.2125	19.8524	28.3645	33.3352	24.4189	23.2856	15.7955	19.3004	41.6531
NFYA	3.35336	20.1315	19.9785	16.0236	139.411	30.8085	8.11226	28.2389	19.4869	179.611	37.7493	4.62973	18.0164	13.5336	131.124	40.0046
TTF1	52.4124	34.7673	34.8103	21.8471	45.0835	41.981	65.4257	31.4541	29.3995	32.392	38.4003	48.5161	47.0839	20.7468	39.4174	44.6688
SETDB2	13.3969	10.7877	8.84257	4.26123	2.01823	3.19709	18.2985	16.5352	5.7305	2.67536	1.52904	9.7776	16.311	3.82722	8.4239	1.68942
ZNF574	9.21786	12.2379	89.9085	56.5113	85.8033	72.2375	16.3123	77.6959	92.0809	95.4648	78.7603	19.1711	72.289	84.9532	93.495	153.888
ZNF121	11.8999	16.0387	9.60385	6.29578	10.7544	15.7828	15.464	17.1164	8.35199	9.05767	8.53784	11.3426	15.5236	5.39742	11.0972	45.0545
ZNF131	20.4786	10.2134	11.927	7.26033	22.3225	9.52276	22.0796	14.8902	10.7425	22.8952	10.6494	12.4852	14.0438	7.85905	21.6337	13.1248
E2F1	0.865845	16.2044	59.1051	44.3785	11.6231	52.2147	26.4888	23.8476	46.3871	11.3592	40.6722	13.4148	36.3789	40.5128	22.2648	19.7276
ZBTB2	58.1595	90.9188	74.9838	49.0214	116.704	44.632	153.565	95.4092	44.1537	49.4838	48.4399	89.8351	92.7198	46.3956	99.5647	57.5138
ZNF236	3.44631	1.81485	5.88646	3.415	1.51039	6.48502	2.86302	6.0627	3.64473	1.64554	4.85234	3.65485	5.09154	4.60961	2.30885	5.36235
ZNF589	0.574724	8.21153	10.5947	10.4053	20.1976	19.5021	6.88837	9.55259	9.10765	15.293	36.0699	5.39154	8.05299	6.42365	15.171	15.0879
ZBTB40	1.79749	3.89423	22.9347	8.77888	14.6702	17.0298	4.89593	28.8879	6.51093	14.7046	21.5318	5.21053	9.34891	11.0671	11.7944	16.4288
ZNF202	4.3777	5.89259	24.9969	14.1654	17.792	3.70493	12.496	48.1295	18.529	22.3852	5.48946	5.98723	25.7222	11.4472	24.036	8.49356
ZNF721	27.9022	53.5626	39.8289	48.0294	11.9184	11.9984	59.1991	64.3218	32.7796	12.0707	10.622	98.5961	67.8892	77.3176	18.3561	25.077
ZNF586	1.02466	16.3298	26.4988	20.4867	74.1129	24.3502	14.5858	27.5885	17.619	44.2775	43.779	13.3549	18.2708	18.7297	73.5726	67.1641
CLOCK	48.7687	44.7711	98.0417	44.3311	17.7739	3.91704	98.5167	131.12	68.6114	22.4647	3.54198	74.7471	110.375	71.8077	41.1122	7.26514
HMGB1	155.699	125.028	112.877	53.406	51.4593	272.001	156.839	92.3422	81.8232	39.3811	270.724	153.962	136.654	50.4342	24.6583	251.706
GATAD2A	1.39417	2.94014	12.0542	8.73779	11.2715	15.3477	6.16887	11.1245	5.71735	9.08959	15.8906	5.43149	6.61427	6.35978	11.2291	14.2113
NFE2L2	70.6333	20.8894	21.6215	9.67236	2.33466	17.402	44.1988	27.2343	10.2883	1.33306	9.1443	42.0186	29.8647	9.9992	3.51126	15.9876
ZFP82	14.3094	11.8162	18.6714	13.1844	23.0884	13.4144	15.6321	32.1669	16.7367	13.0392	16.1504	14.1688	20.1834	11.2005	25.1385	38.7199
RERE	3.08534	3.68757	35.2871	16.0981	3.7799	4.03294	12.0474	24.8983	14.6353	5.01797	2.37764	8.26058	19.5285	19.3069	9.79672	1.80485
ATF6	20.9309	29.8664	44.8419	30.5197	7.15642	12.9887	29.7729	60.5816	30.2176	7.19954	6.68413	24.4521	30.9893	30.5147	9.41869	18.6253
JARID2	237.285	213.965	216.994	107.153	24.097	21.4137	388.229	309.82	157.852	26.8925	10.8415	175.28	295.912	141.609	58.159	27.9252
PKNOX1	18.5097	11.9573	16.2473	10.2711	9.34991	13.1864	11.032	15.9598	14.7336	8.53672	14.1969	7.88348	14.7305	12.8724	11.4828	23.466
SOX15	152.538	194.325	400.428	505.284	886.202	569.486	78.6816	318.651	368.216	577.993	1394.47	274.211	281.617	437.995	249.205	943.186
CDIP1	3.42953	3.99032	13.7331	7.06493	9.30579	4.30137	6.73757	10.8879	7.26257	9.40439	3.99258	7.09956	10.1862	6.9264	19.2391	1.80143
ZNF552	1.11933	1.37108	11.958	7.78967	4.62204	59.7211	2.92617	12.3664	8.28221	8.70189	43.5137	6.36536	9.45456	9.61856	12.5375	117.671
ARID1A	3.2695	3.97038	17.948	6.79074	6.70192	13.375	15.3671	13.8096	7.74626	4.9381	11.2218	8.28181	12.8615	7.38285	5.66287	11.9909
ZNF407	10.3898	14.8809	10.6392	3.82441	3.11009	3.2691	16.4535	14.3851	7.76448	3.0361	4.6399	9.06243	11.1539	3.28497	2.64992	2.28927
ZNF534	27.4292	12.6039	9.96722	16.9595	51.2995	77.3973	27.5262	11.1536	9.36112	34.8558	144.031	12.1779	11.9597	13.9612	21.4505	103.155
ZNF766	15.2986	11.8801	5.80571	5.35104	29.0215	21.4524	14.0491	11.348	3.84974	26.0881	26.0402	6.5748	7.71445	1.74493	14.8938	37.5283
ZBTB43	24.1731	23.2246	28.4704	19.609	13.8144	7.31207	36.6966	39.2815	20.1764	13.5413	9.67986	18.7529	24.228	20.8741	9.75883	11.9545
MTA2	4.05454	3.98473	6.34385	3.37517	20.8202	6.55928	1.97482	9.04372	1.66144	21.527	7.77822	2.37704	5.45372	6.3171	13.0071	11.9148
CBFB	22.0306	27.9854	22.7403	13.061	14.2517	8.68594	40.8759	38.654	14.6321	9.60635	7.84672	25.8041	47.2316	12.5097	13.7002	4.17037
SP3	3.44473	14.1854	18.4891	15.3491	20.956	13.3114	8.38852	19.1213	16.1489	20.308	13.9825	15.2607	23.2962	14.074	19.4634	17.401
ZNF569	13.7658	12.3899	12.9419	10.8569	5.13379	9.30965	17.3298	26.4599	17.4087	6.37249	5.77958	12.0058	14.0413	8.95219	7.65617	13.8812
ZNF300	1.11608	1.02743	2.27762	1.92024	6.05166	2.31838	3.65851	2.86268	2.96173	8.89145	1.82963	1.03189	3.27214	2.60387	9.92144	3.59003
ZBTB39	9.14641	22.9092	94.0239	45.0129	3.07644	2.25047	33.1625	97.7468	57.6852	5.34175	2.68258	36.4724	56.3332	53.5752	8.09406	4.54123
ZNF398	0.329554	2.23884	4.54514	1.88512	4.14752	14.6033	2.16433	5.25155	6.08687	4.57514	10.4255	2.54665	4.76558	1.3664	7.01156	11.2334
NCOR1	74.8988	63.0059	44.8337	66.7656	21.7881	21.3756	74.3985	49.1099	60.8883	23.9519	16.9532	52.9529	50.2202	51.3538	34.0314	16.2895
ZBTB11	7.91361	22.963	25.3303	13.7996	80.2193	26.3133	25.5855	50.2814	15.4304	75.5448	25.677	19.7938	37.0708	12.6633	60.0126	29.6854
POU5F1	9.00935	1.19866	7.18501	23.0283	24.4604	276.932	1.48634	11.1464	5.46504	14.4287	248.684	3.56365	4.65316	10.7796	12.8328	331.768
ZNF573	1.1222	4.03368	6.31568	8.10346	1.37039	1.76072	4.61743	5.77703	5.37653	3.82845	3.08337	3.83731	7.67874	9.67389	3.9295	3.34656
ZNF350	4.9252	13.4175	22.4834	15.4609	87.8612	47.0702	10.1512	17.1095	16.1771	96.6492	32.0197	14.2769	17.4803	12.7115	135.136	78.4816
ZNF324	1.87711	2.48799	6.49226	5.277	9.83959	11.1509	3.92061	7.12772	8.14092	9.52183	8.96343	4.48109	7.29465	5.83458	13.8871	13.9071
ZNF394	2.15024	2.27714	6.39377	4.66609	189.374	46.1574	6.09593	8.27879	4.24805	189.088	68.5496	5.38702	8.9457	4.94152	230.212	91.3143
PRDM4	11.5357	28.9342	46.3036	33.6885	8.423	1.88215	47.9232	49.7564	40.9237	14.1567	1.22796	24.3568	49.6525	30.6022	13.7359	2.11928
ZNF850	6.12349	7.93171	21.0629	14.3281	6.63978	8.64805	6.12683	26.0345	9.45485	11.8249	11.8839	7.31391	17.4309	6.55376	11.7857	20.4389
ZNF256	24.9799	30.0164	31.5785	29.3763	156.938	65.9786	38.0497	55.9996	20.4094	146.44	92.0827	44.3779	40.6224	39.0664	127.267	148.135
RLF	151.044	90.1651	133.046	104.943	103.164	24.0977	201.99	172.628	95.1813	101.721	42.7752	99.6248	161.978	85.2619	87.7825	53.3571
ZNF146	35.462	32.7961	85.4468	38.3966	24.1022	46.5684	32.1015	67.0884	50.116	24.851	30.2847	48.6549	83.7949	40.3692	43.7745	93.2536
MYNN	9.77861	13.9478	15.957	8.40632	7.97402	6.20101	19.7132	19.7781	9.69966	5.92568	6.40771	12.5105	18.0683	7.36678	5.66776	7.02931
WDHD1	40.0416	24.084	26.299	29.1218	19.4542	38.835	57.3611	36.3898	31.9477	25.1856	30.2734	18.5427	28.1689	33.9688	27.6811	57.7344
ZNF764	0.598582	1.09146	6.44237	1.44379	1.84651	19.7682	1.74392	3.57557	2.24013	2.86534	26.6704	1.69595	3.41912	2.94875	1.61847	9.90116
ZHX1	56.2257	34.9859	39.9069	35.3567	14.8084	8.30669	78.1658	52.3568	42.4037	14.4577	3.80504	40.4207	50.7498	29.5384	24.1103	4.08554
DLX6	4.03935	5.59884	12.97	22.2042	4.33033	7.874	14.1038	18.2638	19.6395	9.70951	9.54895	5.28425	21.1631	21.1446	10.7382	10.0004
IKZF5	5.54652	7.00843	2.90711	4.03261	22.0519	6.61883	5.091	4.91646	3.78379	21.6706	6.65972	2.46532	2.41437	4.51991	20.4391	9.81259
ZNF682	10.3891	12.8674	12.4915	5.87832	15.646	5.91381	15.0238	14.1299	6.58524	13.5351	3.39414	9.86161	13.3361	5.8945	18.0804	5.00374
ZNF566	2.04752	2.91516	2.87524	1.58721	2.78951	9.15532	2.13964	6.02696	1.84613	3.10183	8.30348	2.02752	3.90928	1.00872	4.23772	25.6075
DPRX	0.704097	2.73545	14.6244	17.0298	436.582	1045.7	2.24715	6.42314	11.6541	206.161	1715.34	2.42072	4.29111	8.32395	24.2192	422.776
ZSCAN29	6.59902	11.3278	25.8967	18.75	2.15386	4.5609	15.1737	18.2019	14.0234	3.61452	4.58266	10.3535	24.7319	13.828	4.98041	4.14686
ZNF852	1.08229	1.3588	3.07985	1.28188	7.42834	4.66167	3.88983	5.60541	1.32003	5.34944	3.67948	1.33297	3.01463	3.26028	7.64464	3.3606
TULP4	5.15991	4.3536	4.59679	3.72992	8.49026	21.3819	4.10726	4.55085	2.92849	8.95693	11.9045	3.89345	4.90509	2.37245	9.21727	29.0157
SMARCE1	3.93091	6.17123	8.92902	4.65227	1.15437	2.84804	7.40112	7.08056	6.37883	1.22028	3.16478	7.49957	9.45147	4.35158	1.86187	2.75148
ZNF24	5.50221	2.31788	5.95618	3.00615	15.9836	15.0408	5.09928	6.43619	6.16716	9.25998	13.1922	5.84207	7.17727	3.28582	8.15394	17.7865
ZNF189	3.38938	4.42845	13.8646	6.6913	9.32168	1.06979	14.3331	11.1815	11.9177	7.04054	1.86023	15.3199	13.3267	3.61944	14.8708	2.02741
ZNF184	8.58133	21.2529	20.163	16.722	27.1127	6.02437	33.8193	34.7843	16.9653	36.1902	12.7608	12.6595	26.2319	14.8006	31.6776	10.1853
ZBTB17	0.249365	4.56984	13.6482	20.7953	13.0114	12.7289	3.11068	14.991	15.443	15.6663	15.3654	1.96749	9.1188	19.492	12.0857	10.7893
ZNF160	8.99912	10.7721	14.5323	13.1033	2.7705	1.58954	11.8537	16.406	7.96282	2.40019	2.17312	8.53769	11.8698	10.9546	1.96904	3.91632
GABPA	54.6553	69.7419	33.1967	38.6798	225.699	51.1567	61.9797	59.262	41.7484	219.078	53.8088	63.2462	49.5768	36.1138	137.099	63.4486
ZNF142	0.485717	3.48959	37.2712	25.6562	12.6054	17.2541	3.47998	27.5533	12.3992	16.4901	16.1113	8.14985	25.0485	20.712	13.2447	17.0469
THAP12	6.96028	8.06305	10.5283	3.8877	25.8824	10.9175	16.8745	11.7191	7.44795	19.6933	10.9702	12.5329	12.9406	5.30711	27.6033	20.7949
ZNF736	2.26881	9.70733	8.99743	3.5424	33.9976	5.13388	4.08948	19.0603	3.75222	46.2386	5.23824	3.49302	9.00372	3.85058	59.6808	5.43674
PIAS1	91.4747	91.7047	128.263	159.894	74.281	21.221	104.192	169.402	147.395	72.5648	25.7576	102.445	125.776	151.17	82.3077	34.0419
NR1H2	14.8742	5.65916	25.1058	26.6721	29.1211	71.4694	6.39893	27.9667	25.5942	22.2992	78.9792	13.1186	21.0353	30.7555	21.6109	64.6803
ZNF737	12.5693	5.62052	18.399	19.8907	16.2223	7.41499	10.3279	35.4223	17.4464	10.8552	10.7791	18.5611	19.1605	14.9037	7.12943	11.8133
CAMTA1	14.2274	19.1067	6.75936	4.72998	11.9024	7.21412	12.8565	6.50238	5.43148	9.81015	7.13634	15.5047	8.89916	3.7325	9.81302	10.5085
ZNF525	2.21394	8.11159	15.1518	12.9144	2.74954	4.08609	10.8989	17.593	13.7444	3.92392	6.09502	5.46947	17.0745	9.04341	4.4502	10.0039
ZNF761	14.143	66.187	53.7075	65.4968	11.3179	10.6226	78.8403	85.4683	58.7976	3.73822	15.2911	41.4372	69.843	37.1261	3.68135	33.5697
ZNF132	0	2.26309	14.6439	9.59025	6.6569	6.67304	8.08916	21.5699	5.72112	12.1843	4.72463	1.80302	17.8257	3.9711	14.1519	6.65951
MTA3	14.8754	7.98052	15.6919	15.3934	9.78493	14.4498	15.7447	11.1745	17.4911	5.96488	8.45166	14.5419	21.2504	12.0673	4.85782	11.1868
TEAD4	1.35869	4.7665	17.669	27.3086	20.41	239.044	5.48002	13.2956	17.8469	10.7097	213.031	1.62771	10.4817	21.388	9.64967	325.228
ZNF250	7.11893	4.47632	2.51306	2.34239	2.77835	3.24926	1.20191	3.91751	1.52318	3.92238	2.61744	2.4133	2.56788	2.67863	4.14041	1.11194
THAP1	72.8559	70.2552	53.7243	54.0128	123.422	41.629	48.3267	64.8435	44.9926	118.015	61.2643	57.3998	58.4305	27.7273	123.531	46.3935
ZNF506	12.6914	11.7285	14.6073	5.0187	23.6839	4.89672	6.63036	12.6463	7.0522	28.4619	6.5398	11.5314	18.5509	7.60382	33.4028	7.82204
ZNF490	2.82988	5.33037	10.1047	7.31509	4.33391	2.21617	3.79856	10.9561	5.99681	6.52798	1.09535	2.88687	8.25689	5.9885	4.41558	3.79767
NFKB2	4.8557	4.75272	19.9579	27.6961	3.51158	12.7925	2.3131	12.9283	13.3249	2.97416	3.08671	5.83889	10.6759	12.2235	7.06352	13.2726
ATF1	37.516	8.54133	7.46298	5.67597	80.8501	41.8444	28.2327	9.04341	1.49019	64.237	38.5027	20.8026	15.0851	3.71787	72.0744	37.8239
PLAGL2	27.1514	40.2228	270.648	158.02	45.1548	37.0255	71.6425	214.945	129.613	48.7282	46.0613	48.5507	162.388	175.373	111.193	46.0079
ZNF207	7.61314	8.65628	10.3174	8.96299	35.5371	28.1955	9.39475	18.1299	9.37484	31.6122	46.4989	6.54866	9.08689	11.1365	25.1182	38.2325
BCLAF1	41.7119	22.5609	22.8379	14.9612	26.7401	26.9702	58.8386	35.8454	11.5038	23.6238	24.826	28.6042	25.0797	13.3875	24.3582	35.9379
TFB1M	19.9295	12.5982	13.6934	8.13523	14.3221	40.5419	19.3192	13.8132	15.546	34.313	27.5986	15.1776	12.6752	7.44969	8.51142	26.7101
GPBP1	188.646	152.38	150.028	88.5999	114.216	101.789	192.742	180.918	91.1865	107.859	108.485	122.001	152.295	74.5719	112.169	144.341
MLLT10	7.49038	10.1629	15.1475	8.38043	6.12963	13.4273	9.06192	15.0361	10.0475	5.93594	9.66628	12.0344	17.3656	9.31199	6.9887	13.3767
KHSRP	1.05565	2.82113	42.462	21.8134	13.9321	26.9648	5.48891	23.7523	15.0139	20.0519	30.9862	7.19574	34.0134	25.6649	21.2342	34.6961
HIF1A	19.6248	26.5412	21.6644	37.525	14.9167	6.24519	40.33	40.6689	33.9399	13.3354	4.56698	20.3032	33.1357	37.737	11.5828	9.96876
ADNP2	6.95734	12.3425	17.1185	7.22621	25.1582	13.5815	8.28507	24.2932	10.6937	24.3252	21.7078	8.98492	25.8515	12.3992	34.3728	29.1131
GABPB1	25.5799	35.9016	16.339	25.152	14.0559	11.913	30.4638	34.3073	25.4798	7.73559	9.17052	23.04	25.0153	23.0616	10.0578	20.2036
TAX1BP1	469.807	406.118	238.715	253.978	38.4112	96.381	531.963	311.232	263.623	55.8153	68.9304	353.694	295.615	204.669	59.3156	123.085
CENPA	119.372	53.8813	30.8788	11.3625	60.9577	58.8004	80.8908	57.7036	29.8727	88.5617	43.0412	95.2963	27.0824	23.0069	58.2567	50.335
CEBPZ	45.042	35.8386	22.3975	7.95233	108.387	131.466	33.8312	22.0418	10.2925	108.55	124.272	31.3912	19.2597	9.14052	60.1585	194.823
EPAS1	8.94663	17.4744	60.7931	76.2273	7.16133	3.01212	23.1288	80.1076	68.0817	11.7807	3.50871	21.8289	54.3565	40.8626	5.00826	1.31006
SFPQ	12.3941	18.3974	15.7222	8.16103	36.1439	58.9737	28.2226	17.9751	7.97245	44.3669	56.2906	15.8908	19.8848	9.25445	29.3848	57.52
GON4L	4.31001	3.53771	11.2928	9.90126	8.3914	8.95634	3.68605	10.6055	7.48821	9.2501	9.36592	4.31117	11.1199	8.48534	12.442	8.6466
PHTF1	13.6308	16.6679	11.872	5.88956	7.71878	1.70001	16.8362	14.5194	14.4214	5.77485	2.56905	19.4636	13.8031	9.5967	8.05524	3.3601
BLZF1	47.6321	35.3599	23.9419	10.337	38.9874	20.3212	38.4745	50.189	24.3594	45.7215	27.4482	20.0439	42.1988	7.53322	39.2511	39.7937
ZNF706	58.3412	19.9386	7.94697	5.44416	6.20358	32.7225	19.5834	14.1972	6.30153	8.26799	22.0185	31.1578	10.9208	7.16824	7.26913	49.6648
RBCK1	1.07983	5.44635	14.7913	8.94048	3.01488	7.94076	4.85022	8.83549	9.34703	2.68993	8.33018	3.84736	8.6884	8.48638	3.84196	5.37018
YEATS4	116.932	137.805	108.59	48.4974	14.1323	81.0399	98.1481	123.291	72.1688	13.8609	44.7825	169.02	131.456	56.0427	22.6985	72.8986
PREB	0.152298	6.13733	19.4954	16.8782	20.4835	47.1139	7.12611	12.1304	11.1712	20.7436	65.0646	6.52989	12.5499	16.8266	18.0607	59.4644
GABPB2	10.3836	3.08765	2.95998	3.29525	6.55214	5.24243	2.83629	3.30699	2.46214	4.47003	3.71149	3.43867	1.41005	1.89443	14.4459	4.91278
TMF1	14.6409	15.4496	16.0471	10.9602	17.2107	13.7276	22.9115	16.5282	15.4158	24.8486	13.7405	18.1603	12.7118	8.89073	31.6237	7.64308
LYAR	338.231	120.993	81.5094	33.5482	119.533	154.93	199.394	102.235	55.5247	124.157	189.889	138.676	115.991	48.3673	124.52	301.128
CIZ1	0.0841304	2.19352	6.65648	3.48159	2.61056	17.9428	1.89459	6.00983	4.2081	2.72559	12.6268	1.85201	6.27088	4.90714	1.66188	6.81171
THYN1	318.352	400.339	319.29	323.956	52.3748	19.328	348.758	314.884	343.292	31.3494	11.7072	391.211	376.654	280.309	39.3366	12.5158
AHCTF1	11.7846	12.7469	19.1481	10.0254	50.7827	20.3151	27.1265	23.404	18.6168	54.8034	21.0345	18.6459	35.2293	14.1046	43.1702	27.6729
ELMSAN1	3.21626	25.8498	11.7757	10.2948	32.6765	17.9129	24.5599	15.9542	13.2421	16.2447	12.1565	12.1491	9.1248	11.2128	10.245	15.4857
SON	34.559	40.5299	36.2698	19.815	48.868	30.8793	59.4795	28.4257	24.9235	44.0003	31.161	42.4113	41.6135	21.1871	58.239	43.2934
GPBP1L1	5.46195	10.7798	16.4876	10.325	40.4617	31.0934	13.3548	19.9025	11.0457	43.5687	23.5149	8.44102	18.2714	11.1731	39.5376	30.9175
PHB	14.3315	21.2527	16.5718	23.3829	44.592	153.124	13.1741	14.7996	21.0901	44.9151	178.766	14.7279	14.2274	19.5296	33.8244	218.473
TET2	4.82222	5.23531	6.31177	10.5953	2.91977	3.74513	4.94627	8.52097	7.26078	3.42143	1.63104	4.22752	7.16342	6.69259	3.93031	9.07898
CNBP	802.63	371.427	505.382	413.143	600.369	1015.21	359.956	572.219	480.94	443.642	1229.64	392.475	577.235	440.072	495.308	644.78
NFRKB	23.542	30.9511	98.6611	43.8453	20.1961	36.236	36.971	98.4543	46.3882	27.0432	29.0239	40.8121	87.3352	50.4085	17.2518	45.5398
ZNF318	1.41204	2.96272	15.7668	5.69843	5.52057	20.7369	8.35264	13.562	9.78906	7.31687	18.6585	8.57733	12.7314	6.68596	17.3947	22.8252
CENPS	1.74547	5.9758	4.79912	6.74853	2.21925	1.84555	5.65497	4.68867	7.64102	1.13362	1.25549	5.50505	5.56342	5.13841	1.44934	1.38745
MAF1	7.07042	2.09689	13.8808	16.4253	11.8819	68.546	2.78645	7.87863	11.9473	22.0981	61.4554	5.99545	8.50467	14.8259	17.3482	64.0369
ZNF280B	475.496	219.386	110.059	133.043	146.676	3.62251	190.375	202.345	142.951	78.5446	7.42886	143.717	102.054	212.029	111.316	2.74574

## Sheet: Supplementary Table3
Table S3. GO terms of up-regulated DE-TFs form 1- to 2-cell stage in BI embryos Related to Figure 2.
ID	GO Terms	Count	P-value
GO:0006338	chromatin remodeling	4	0.001594
GO:0033233	regulation of protein sumoylation	2	0.01375

## Sheet: Supplementary Table4
Table S4. Top 5 highly differentially expressed (up and down-regulated ) genes between AG vs BI or PG vs BI. Related to Figure 2.
	Stage	Symbol	Log2FC	P adjust
AG vs BI	2-Cell	CENPA	1.19739	0.00178749
		ZNF816	1.06297	0.024535
		SSRP1	-1.13344	0.00497585
		HMGA1	-1.10483	0.000389518
	8-Cell	ZNF616	1.91913	3.05836e-05
		TFB1M	1.44409	0.00223929
		ZBTB24	1.3231	0.00551469
		ZBTB33	-1.68503	0.0389127
		HMGB3	-1.09116	5.36928e-11
	Morula	ZIK1	1.41199	0.000103584
		ZNF143	1.29383	5.93597e-07
		ZNF816	1.15731	0.000121218
		ZNF211	1.07652	0.00934622
		ZNF473	1.01215	0.0001546
		NSD2	-1.15404	5.82692e-06
		EGR1	-2.92491	7.49736e-07
		FOS	-2.13924	1.98691e-05
		ELK3	-1.34901	0.000447466
		ZNF623	-1.10658	0.0041575
PG vs BI	1-Cell	ZNF304	-2.06653	0.0377742
		ZNF557	-1.6815	0.00396007
	2-Cell	ADNP	1.30943	0.00834143
		ELK4	1.30893	0.023327
		ZNF22	1.28208	0.00629565
		SETDB2	1.24315	0.00576869
		ZNF680	1.22997	0.0420369
		SOX13	-1.18172	0.0349555
		ZBTB40	-1.1258	0.0469876
	8-Cell	JARID2	1.42421	0.000584271
		ZNF616	1.35661	0.00746115
		ZNF215	1.3027	0.00836302
		ZBTB24	1.29512	0.00820774
		ARID4B	1.26866	5.32715e-06
		DPRX	-3.13417	1.00828e-06
		LIN28A	-2.96799	2.21426e-09
		SOX15	-2.07265	1.17295e-09
		ZNF28	-1.39255	0.0120863
		ZBTB21	-1.19681	0.00907819
	Morula	ZFP3	1.87772	0.0106993
		ZNF776	1.78548	0.000216788
		ZNF518B	1.407	8.15122e-07
		ZNF121	1.35902	1.42772e-06
		ZNF304	1.31426	0.00202375
		MSX2	-2.42713	3.65535e-05
		FOS	-2.253	0.000855947
		DMRTB1	-1.51194	0.0264495
		ELK3	-1.3681	0.000210277
		ZNF532	-1.33797	0.0200473

## Sheet: Supplementary Table5
Table S5. GO terms of DE-TFs between PG embryos and BI embryos in morula stage. Related to Figure 2.
DE-TF UpDown	ID	GO Terms	Count	P-value
Up	GO:0015074	DNA integration	2	0.007351
Down	GO:2000678	negative regulation of transcription regulatory region DNA binding	2	0.014242
Down	GO:2000677	regulation of transcription regulatory region DNA binding	2	0.027478
Down	GO:0043392	negative regulation of DNA binding	2	0.027478
Down	GO:0007178	transmembrane receptor protein serine/threonine kinase signaling pathway	3	0.032597
Down	GO:0001942	hair follicle development	2	0.032597
Down	GO:0022404	molting cycle process	2	0.032597
Down	GO:0022405	hair cycle process	2	0.032597
Down	GO:0098773	skin epidermis development	2	0.032597
Down	GO:0042303	molting cycle	2	0.037399
Down	GO:0042633	hair cycle	2	0.037399
Down	GO:0051101	regulation of DNA binding	2	0.037399

## Sheet: Supplementary Table6
Table S6. GO terms of targets of PHB-specific genes. Related to Figure 5.
GO Terms	ID	Count	Gene Symbol	P-value
Stem cell population maintenance	GO:0019827	9	YAP1, SOX2, SALL4, STAT3, TET1, PBX1, FOXP1, CTNNB1, NANOG	4.34965e-10
Maintenance of cell number	GO:0098727	9	YAP1, SOX2, SALL4, STAT3, TET1, PBX1, FOXP1, CTNNB1, NANOG	4.34965e-10
Somatic stem cell population maintenance	GO:0035019	7	YAP1, SOX2, SALL4, STAT3, PBX1, FOXP1, NANOG	3.26769e-09
Signaling pathways regulating pluripotency of stem cells	hsa04550	7	SOX2, MYC, JARID2, STAT3, CTNNB1, NANOG, TCF3	4.56666e-06
Beta-catenin-TCF complex assembly	GO:1904837	4	MYC, EP300, SMARCA4, CTNNB1	1.65887e-05
Transcriptional misregulation in cancer	hsa05202	7	MYC, PAX3, PBX1, PMYCN, EWSR1, TCF3, TP53	1.73096e-05
Covalent chromatin modification	GO:0016569	8	KDM5B, TRIM28, EP300, JARID2, TET1, HCFC1, CTNNB1, TP53	3.17434e-05
Human T-cell leukemia virus 1 infection	hsa05166	6	CCND1, MYC, EP300, EGR1, TCF3, TP53	0.00018381
Thyroid hormone signaling pathway	hsa04919	5	CCND1, MYC, EP300, CTNNB1, TP53	0.00018381
Hippo signaling pathway	hsa04390	5	YAP1, SOX2, CCND1, MYC, CTNNB1	0.00042138

## Sheet: Supplementary Table7
Table S7. GO terms of targets of POU5F1-specific genes. Related to Figure 5.
GO Terms	ID	Count	Gene Symbol	P-value
Signaling pathways regulating pluripotency of stem cells	hsa04550	7	SMAD3, STAT3, POU5F1, SOX2, MYC, NANOG, TCF3	1.23006e-09
Somatic stem cell population maintenance	GO:0035019	6	STAT3, POU5F1, SOX2, SALL4, NANOG, SOX9	6.87584e-09
Stem cell population maintenance	GO:0019827	7	STAT3, TET1, POU5F1, SOX2, SALL4, NANOG, SOX9	6.87584e-09
Maintenance of cell number	GO:0098727	7	STAT3, TET1, POU5F1, SOX2, SALL4, NANOG, SOX9	6.87584e-09
Cell fate commitment	GO:0045165	7	STAT3, POU5F1, SOX2, NANOG, SOX9, TCF3, TP53	2.18382e-07
mRNA transcription	GO:0009299	3	STAT3, POU5F1, TP53	0.000105286
Proteoglycans in cancer	hsa05205	4	STAT3, MYC, NANOG, TP53	0.00080604
Human T-cell leukemia virus 1 infection	hsa05166	4	SMAD3, MYC, TCF3, TP53	0.00080604
Cell cycle	hsa04110	3	SMAD3, MYC, TP53	0.00259605
Cellular senescence	hsa04218	3	SMAD3, MYC, TP53	0.0033819

## Sheet: Supplementary Table8
Table S8. Number of cells for epigenetic analysis at different developmental stages. Related to Figure 6.
	2-Cell	4-Cell	8-Cell
AG	4	3	2
BI	2	2	3
PG	4	6	5
